# Supplementary material
Source: publisher figshare collection journal article supplement (https://acs.figshare.com/ndownloader/files/23035055)
Supplement: Supplementary file 1 [file 23035055]

# Supporting Information

## Nonplanar perylene diimide-based small molecule and its polymer as electron acceptors

*Xiaoya Hou<sup>a,b,d</sup>, Shenglong Sang<sup>b</sup>, Jia Wei Pan<sup>b</sup>, Zhongyuan Xue<sup>b</sup>, Bo Wu<sup>b</sup>,  
Fen Qiao<sup>e</sup>, Linghai Xie<sup>f</sup>, Baomin Zhao<sup>f</sup>, Fei Chen<sup>c\*</sup>, Jie Zhang<sup>a\*</sup>, Zhikuan  
Chen<sup>b,c</sup>*

<sup>a</sup> School of Mechanical Engineering, Jiangnan University, No.1800, Lihu Avenue, Wuxi City, Jiangsu 214122, P.R. China. <sup>b</sup> Key Laboratory of Flexible Electronics (KLOFE) and Institute of Advanced Materials (IAM), National Jiangsu Synergetic Innovation Center for Advanced Materials, Nanjing Tech University, No. 30, South Puzhu Road, Nanjing 211816, China. <sup>c</sup> Center of Flexible Electronic Materials and Devices, University of Nottingham Ningbo China, No.199, Taikang East Road, Ningbo 315100, P.R. China. <sup>d</sup> Jiangsu Key Laboratory of Advanced Food Manufacturing Equipment and Technology (Jiangnan University), No.1800, Lihu Avenue, Wuxi City, Jiangsu 214122, P.R. China. <sup>e</sup> School of Energy & Power Engineering, Jiangsu University, Zhenjiang, 212013, P R China, No.301, Xuefu Road, Zhenjiang, Jiangsu 212013, P.R. China. <sup>f</sup> Key Laboratory for Organic Electronics and Information Displays and Institute of Advanced Materials (IAM), Nanjing University of

Posts and Telecommunications, No.9, Wenyuan Road, Nanjing City, Jiangsu  
210023, P.R. China.

### **Corresponding Authors**

Jie Zhang, Email: jiezhang@jiangnan.edu.cn;

Fei Chen, Email: fei.chen@nottingham.edu.cn.

### **Equipments**

UV spectra measurements were taken by Genesys 10s UV-vis spectrophotometer, Thermoscientific. CV was measured by Chi660e CH instrument. PL spectra was measured by F97 Pro Fluorospectrophotometer. EQE was measured by QE-R3011 Quantum Efficiency Measurement System, Enlitech. The organic films were spin-casted using Laurell Spin Coater, while as ZnO layer was prepared by EZ4 spin coater. The film thickness was measured by P7 STYLUS PROFILER, KLA Tencor. The HOMO values of A1 and A2 were measured by an Ionization Energy Measurement System Model IPS-4 (Nanjing SunnyTech Ltd., China). Metal electrodes was evaporated using IDF-5227 evaporator.

### **Synthesis**

#### **SDTF-PDI<sub>2</sub>**

A 100 mL Schlenk bottle was added with SDTF-diSnMe<sub>3</sub> (0.135g, 0.15 mmol), PDI-Br (0.275 g, 0.33 mmol), Pd(PPh<sub>3</sub>)<sub>4</sub> (8.7 mg, 0.0075 mmol), toluene (50 mL), reacted at 110 °C under nitrogen for 24 h. The crude product was extracted by CH<sub>2</sub>Cl<sub>2</sub> and purified by gel column chromatography. <sup>1</sup>H NMR (300 MHz, CDCl<sub>3</sub>, δ): 8.63(s, 3H), 8.58-8.53(dd, 2H ), (8.37, 8.34) (d, 2H), (7.70, 7.68) (d, 1H), 7.42-7.30 (2H), (7.17, 7.15) (d,1H), 6.67(s, 1H), 2.24 (s, 4H), 1.84 (s, 4H), (1.43-1.22)(36H), (0.87-0.80)(12H). <sup>13</sup>C NMR (75 MHz, CDCl<sub>3</sub>, δ): 152.76, 145.71, 143.97, 142.26, 140.06, 133.00, 132.77, 128.44, 127.96, 127.14, 126.82, 126.41, 124.20, 124.12, 123.99, 123.20, 122.80, 122.66, 122.17, 55.35, 32.76, 32.10, 32.03, 29.52, 27.33, 27.23, 22.89, 22.83, 14.30, 14.25, 1.18. MALDI-TOF-MS (1855.94).

### **SDTF-FPDI<sub>2</sub>**

A 50 mL Schlenk bottle added by SDTF-PDI<sub>2</sub>(0.256 g, 0.14 mmol), FeCl<sub>3</sub> (0.568 g, 3.5 mmol) in dry Toluene (20 mL), CH<sub>3</sub>NO<sub>2</sub> (0.7 mL) was added to the reaction system. Reacted at 110 °C for 5 h. Quenched by water and extracted by dichloromethane (DCM) and the organic phase was collected and evaporated to get the crude product, which was purified by gel column chromatography with hexane:DCM (2:1). The pure dull-red product was collected with a yield of 70%. <sup>1</sup>H NMR (300 MHz, CDCl<sub>3</sub>, δ): 8.64(s, 3H), 8.58-8.53(dd, 2H), 8.34 (2H), (7.70, 7.68) (d, 1H), 7.42-7.30 (2H), (7.17, 7.15) (d,1H), 6.68(s, 1H), 2.25 (s, 4H), 1.85 (s, 4H), (1.30-1.22) (32H), (0.87-0.80)

(12H), 0.07 (18H).  $^{13}\text{C}$  NMR (75 MHz,  $\text{CDCl}_3$ ,  $\delta$ ): 157.32, 145.66, 143.75, 141.71, 140.63, 134.96, 134.38, 134.30, 133.68, 129.48, 129.36, 128.93, 128.52, 128.25, 127.69, 123.85, 123.42, 122.88, 120.54, 62.94, 54.99, 54.83, 32.58, 32.53, 31.95, 31.90, 29.42, 29.35, 22.78, 22.72, 14.21, 14.17. Calcd for  $\text{C}_{121}\text{H}_{128}\text{N}_4\text{O}_8\text{S}_2$ : C, 79.39; H, 7.05; N, 3.06; S, 3.50. Found: C, 79.31; H, 6.79; N, 3.11; S, 2.76. MALDI-TOF-MS (1828.91).

### **SDTF-FPDI<sub>2</sub>-diBr**

A 25 mL Schlenk bottle added by SDTF-FPDI<sub>2</sub> (70 mg, 0.03824 mmol) and  $\text{FeCl}_3$  (33 mg, 0.317 mmol) in 11 mL  $\text{CHCl}_3$  (0.003 M),  $\text{Br}_2$  (37.5  $\mu\text{l}$ , 0.732 mmol) in 3.7 mL  $\text{CHCl}_3$  was added dropwise at 0°C and returned to RT, and reacted at 70°C for 3 h. The resultant returned to RT, quenched by water and extracted by  $\text{CH}_2\text{Cl}_2$ . The organic phase was evaporated to remove the solvent and the crude product was purified by the gel column chromatography with the solvent of hexane:DCM (2:1) to get pure deep red solid with the yield of 50%.  $^1\text{H}$  NMR (300 MHz,  $\text{CDCl}_3$ ,  $\delta$ , ppm): 9.74 (s, 1H), (9.12-9.19) (dd, 2H), 8.93-9.0 (2H), 8.71 (2H), (7.50-7.53) (dd, 1H), 7.21 (1H), 5.37 (2H), 2.43 (s, 5H), 2.03 (s, 5H), 1.23-1.42 (41H), 0.85-0.91 (16H), 0.07 (s, 15H).  $^{13}\text{C}$  NMR (75 MHz,  $\text{CDCl}_3$ ,  $\delta$ ): 150.87, 144.01, 143.75, 142.68, 142.22, 133.05, 132.95, 132.70, 131.44, 128.31, 127.20, 126.89, 126.85, 126.16, 126.02, 124.32, 124.00, 123.30, 122.84, 122.76, 122.31, 67.41, 55.39, 32.75, 32.13, 32.01, 29.51, 27.32, 27.23, 22.91, 22.82, 14.30, 14.24, 1.17. Calcd for

$C_{121}H_{126}Br_2N_4O_8S_2$ : C, 73.09; H, 6.39; N, 2.82; S, 3.23. Found: C, 73.63; H, 6.19; N, 2.88; S, 2.62. MALDI-TOF-MS (1984.74).

### **P(SDTF-FPDI<sub>2</sub>-T)**

In 10 mL Schlenk SDTF-FPDI<sub>2</sub>-diBr (122 mg, 0.06136 mmol), 2,5-bis(trimethylstannyl)thiophene (25.14 mg, 0.06136 mmol), Pd<sub>2</sub>(dba)<sub>3</sub> (1.68 mg, 0.00184 mmol, 3 mol%) and P(o-Tol)<sub>3</sub> (2.989 mg, 0.00982 mmol, 16 mol%) were added, vacuumed and nitrogen purged three times. Dry chlorobenzene (2.35 ml) was added with syringe into the Schlenk. The system reacted at 130 °C under nitrogen for 3 days and returned to RT. And add 250 mL methanol and 15 mL HCl to be stirred overnight. And then filtered and Soxhlet extraction subsequently by methanol, acetone, hexane and chloroform. The number molecular weight  $M_n$  is 88,982 and  $M_w$  of 104,052, PDI of 1.17. Calcd for  $C_{125}H_{128}N_4O_8S_3$ : C, 78.6; H, 6.96; N, 2.89; S, 4.96. Found: C, 78.07; H, 6.65; N, 2.79; S, 4.27.

### **Device fabrication**

ITO was successively cleaned by detergent, deionized water, acetone and isopropyl alcohol (IPA). The ITO was dried by nitrogen and then cleaned by UV-O<sub>3</sub> UVO<sub>3</sub> cleaner for 30 min. PEDOT:PSS was deposited on ITO at 6000 rpm for 1 min and annealed at 120 °C for 30 min, with a thickness of 46 nm. The blend solution of PTB7-Th:acceptor dissolved in chlorobenzene was

stirred at 60 °C under nitrogen in the glove box overnight, filtered by poly(tetrafluoroethylene) (PTFE) filter (0.45 µm, 13mm), and deposited as the active layer by spin coating. PDIN (1.5 mg/mL) in methanol with 0.3% acetic acid was prepared at ready and the solution was spin coated on the active layer at 3000 rpm for 30 s without further thermal treatment. LiF and Al were vacuum evaporated on the active layer.

### **Hole mobility measurement**

The hole mobilities were measured using the SCLC method, with the device architecture of ITO/PEDOT:PSS/active layer/MoO<sub>3</sub>(2nm)/Al(100nm). The mobilities were obtained by taking current-voltage curves and fitting the curves to a space charge limited form, where the SCLC is described by the equation,  $J=(9/8)\epsilon_r\epsilon_0\mu(V^2/L^3)$ , where  $\epsilon_0$  is the permittivity of free space,  $\epsilon_r$  is the relative permittivity of the material (assumed to be 3 for organic materials),  $\mu$  is the hole mobility and L is the film thickness. From the plots of  $J^{1/2}$  vs. V, hole mobilities can be deduced.

### **Electron mobility measurement**

The electron mobilities were measured using the SCLC method, employing a device architecture of ITO/ZnO/Active layer/PDIN/Al. The mobilities were obtained by taking current-voltage curves and fitting the curves to a space charge limited form, where the SCLC is described by the equation,

$J=(9/8)\epsilon_r\epsilon_o\mu(V^2/L^3)$ . By linearly fitting  $J^{1/2}$  with  $V$ , the mobilities were extracted from the equation of

$$\mu=(8/9)(L^3/\epsilon_r\epsilon_o)(J/V^2)= (8/9)(L^3/\epsilon_r\epsilon_o)\text{slope}^2$$

### Absorption coefficient

The absorption coefficient in the solution

**SDTF-FPDI<sub>2</sub>**: m=1.7 mg, C=5.29×10<sup>-6</sup> mol/L, A=0.488,  $\epsilon=5.22\times10^4$  L/(mol cm)

**SDTF-FPDI<sub>2</sub>-diBr**: m=2 mg, C=1.0×10<sup>-5</sup> mol/L, A=0.317,  $\epsilon=3.17\times10^4$  L/(mol cm)

**P(SDTF-FPDI<sub>2</sub>-T)**: m=2.8 mg, C=3.15×10<sup>-7</sup> mol/L, A=0.996,  $\epsilon=3.2\times10^6$  L/(mol cm)

The absorption spectra of blend films in Figure S3(b):

**SDTF-FPDI<sub>2</sub> blend film**: d=100 nm, A=0.3217 ( $\lambda_{\text{max}}=440$  nm)

**SDTF-FPDI<sub>2</sub>-diBr blend film**: d=108 nm, A=0.2717 ( $\lambda_{\text{max}}=491$  nm)

**P(SDTF-FPDI<sub>2</sub>-T) blend film**: d=125 nm, A=0.5249 ( $\lambda_{\text{max}}=439$  nm)

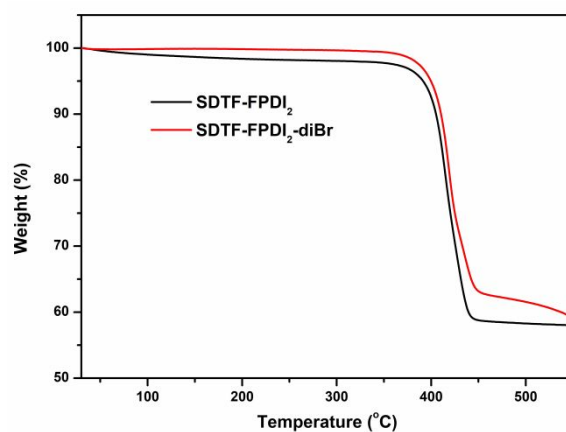

**Figure S1.** TGA curves of SDTF-FPDI<sub>2</sub> and SDTF-FPDI<sub>2</sub>-diBr

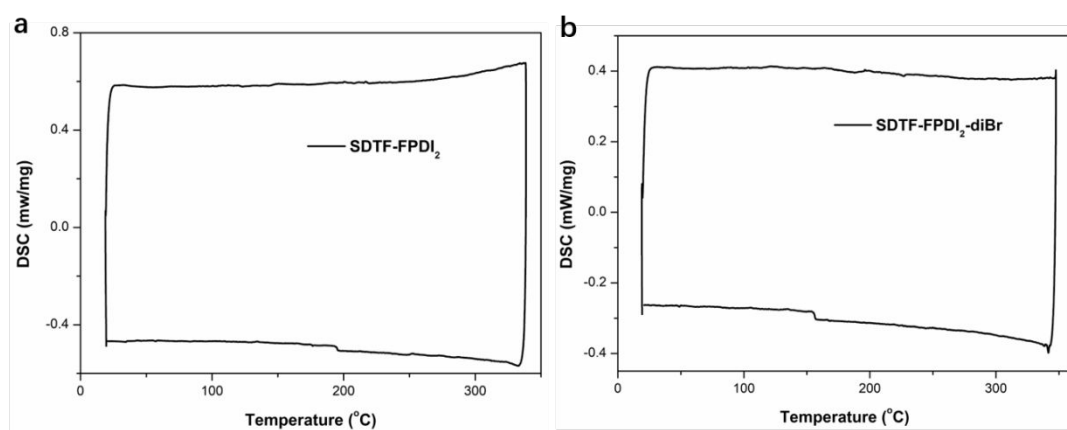

**Figure S2.** DSC curves of SDTF-FPDI<sub>2</sub> and SDTF-FPDI<sub>2</sub>-diBr

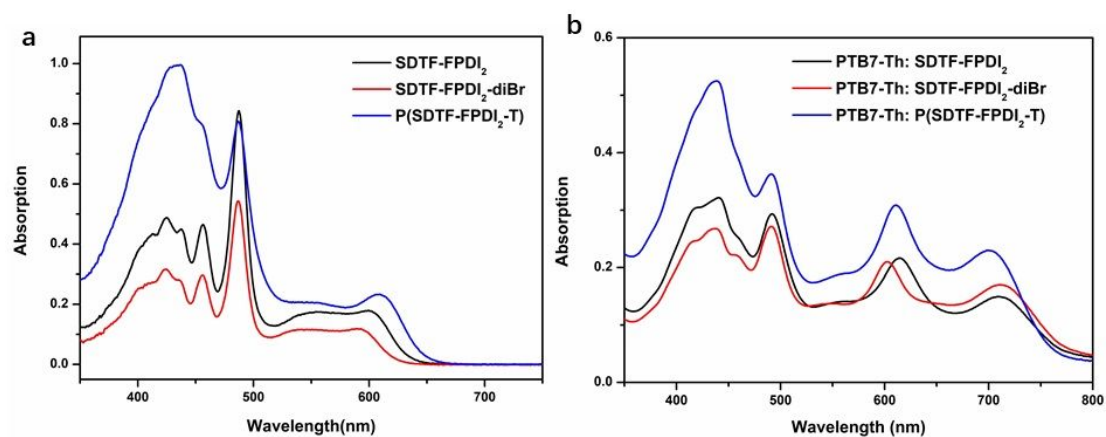

**Figure S3.** Absorption spectra of three electron acceptors in solution and blend film



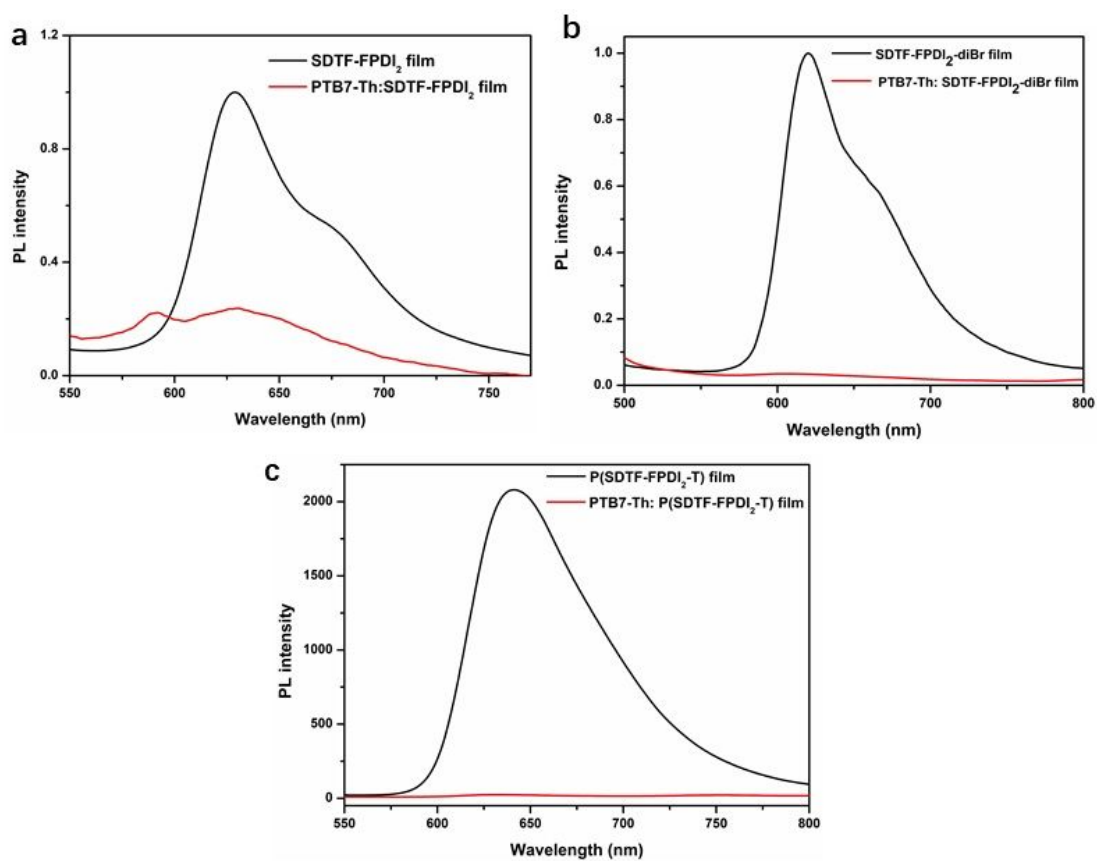

**Figure S4.** PL spectra of SDTF-FPDI<sub>2</sub>, SDTF-FPDI<sub>2</sub>-diBr and P(SDTF-FPDI<sub>2</sub>-T) films and the blend films with PTB7-Th

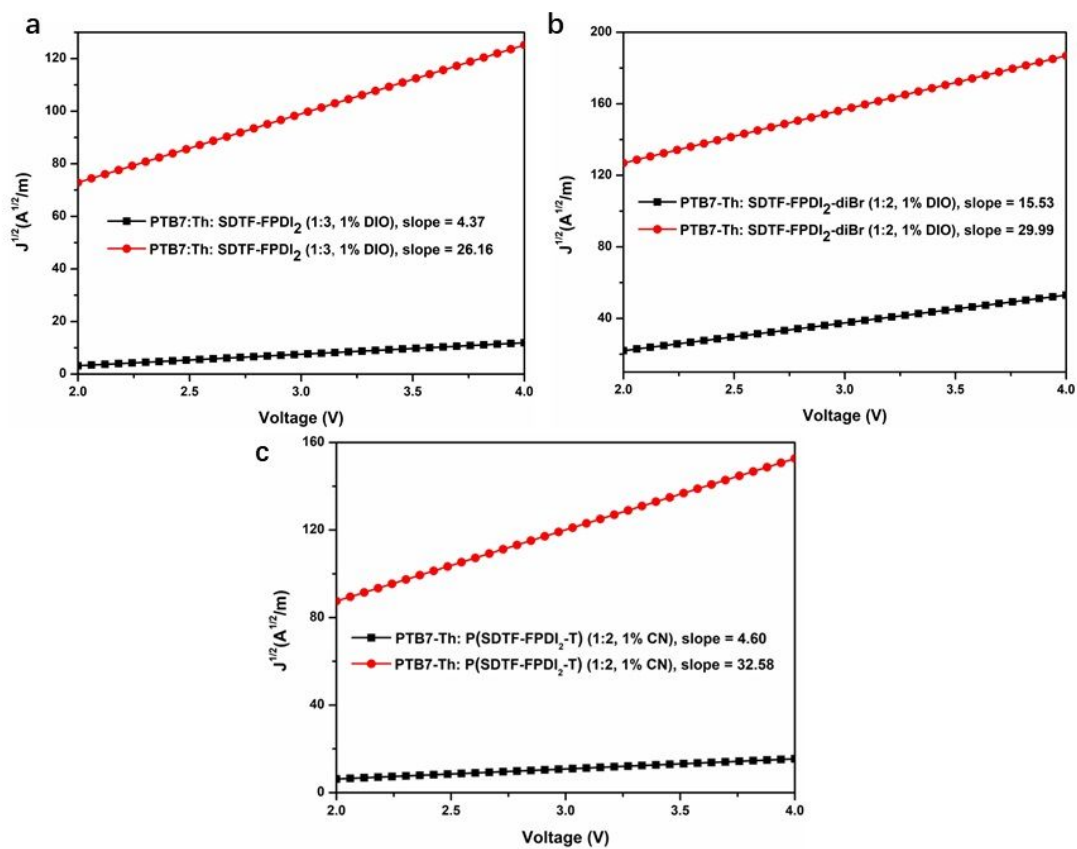

**Figure S5.**  $J^{1/2}$ -V curves of electron-only (in dark) and hole-only devices (in red)**Table S1.** Photovoltaic performances of devices based on PTB7-Th: SDTF-FPDI<sub>2</sub>

| D:A | Solvent additive | Annealing (°C) | ETL  | $V_{oc}$ (V) | FF (%) | $J_{sc}$ (mA/cm <sup>2</sup> ) | PCE (%) |
|-----|------------------|----------------|------|--------------|--------|--------------------------------|---------|
| 1:1 | --               | 80             | LiF  | 0.74         | 19.51  | 1.22                           | 0.17    |
| 1:2 | --               | 100            | LiF  | 0.86         | 25.07  | 1.32                           | 0.28    |
| 1:2 | 3%CN             | 100            | LiF  | 0.89         | 38.91  | 3.88                           | 1.34    |
| 1:2 | 3%CN             | 80             | PDIN | 0.88         | 42.04  | 4.33                           | 1.61    |
| 1:2 | 1%CN             | --             | PDIN | 0.85         | 31.00  | 3.68                           | 0.97    |
| 1:2 | 1%DIO            | 80             | PDIN | 0.87         | 35.39  | 7.33                           | 2.26    |
| 1:2 | 3%DIO            | 80             | PDIN | 0.8          | 35.65  | 5.78                           | 1.76    |
| 1:2 | 1%DPE            | 100            | PDIN | 0.90         | 31.74  | 6.71                           | 1.91    |

**Table S2.** Photovoltaic performances of devices based on PTB7-Th: SDTF-FPDI<sub>2</sub>-diBr

| D:A | Solvent additive | Annealing (°C) | $V_{oc}$ (V) | FF (%) | $J_{sc}$ (mA/cm <sup>2</sup> ) | PCE (%) |
|-----|------------------|----------------|--------------|--------|--------------------------------|---------|
| 1:1 | -                | 80             | 0.88         | 11.71  | 2.73                           | 0.28    |
| 1:1 | -                | 100            | 0.85         | 11.57  | 1.72                           | 0.17    |
| 1:3 | -                | 100            | 0.73         | 12.19  | 1.42                           | 0.28    |
| 1:1 | 1%DIO            | -              | 0.94         | 40.64  | 5.21                           | 1.99    |
| 1:1 | 1%DIO            | 80             | 0.74         | 18.09  | 3.99                           | 0.53    |
| 1:1 | 1%DIO            | 100            | 0.90         | 22.34  | 5.28                           | 1.06    |
| 1:2 | 3%DIO            | 100            | 0.93         | 48.54  | 6.73                           | 3.03    |
| 1:2 | 1%DPE            | 80             | 0.90         | 46.70  | 8.95                           | 3.75    |
| 1:2 | 3%DPE            | 100            | 0.90         | 41.09  | 6.54                           | 2.42    |
| 1:2 | 1%CN             | 80             | 0.94         | 22.44  | 4.83                           | 1.02    |

**Table S3.** Photovoltaic performances of devices based on PTB7-Th: P(SDTF-FPDI<sub>2</sub>-T)

| D:A | Solvent additive | Annealing (°C) | ETL  | $V_{oc}$ (V) | FF (%) | $J_{sc}$ (mA/cm <sup>2</sup> ) | PCE (%) |
|-----|------------------|----------------|------|--------------|--------|--------------------------------|---------|
| 2:1 | --               | --             | LiF  | 0.91         | 21.97  | 3.50                           | 0.70    |
| 1:1 | --               | --             | LiF  | 0.94         | 21.71  | 7.20                           | 1.47    |
| 1:2 | --               | --             | LiF  | 0.94         | 21.10  | 8.58                           | 1.69    |
| 1:2 | 3% CN            | 80             | LiF  | 0.92         | 30.53  | 8.52                           | 2.40    |
| 1:4 | 3% CN            | 80             | LiF  | 0.94         | 31.47  | 7.61                           | 2.25    |
| 1:2 | 3% CN            | 100            | PDIN | 0.90         | 44.42  | 8.09                           | 3.24    |

**Table S4.** The electron and hole mobility of the blend film

| D:A                                          | $\mu_e$ (cm <sup>2</sup> /Vs) | $\mu_h$ (cm <sup>2</sup> /Vs) |
|----------------------------------------------|-------------------------------|-------------------------------|
| PTB7-Th: SDTF-FPDI <sub>2</sub> , 1%DIO      | 0.64*10 <sup>-5</sup>         | 2.29*10 <sup>-4</sup>         |
| PTB7-Th: SDTF-FPDI <sub>2</sub> -diBr, 1%DIO | 1.02*10 <sup>-4</sup>         | 3.79*10 <sup>-4</sup>         |
| PTB7-Th: P(SDTF-FPDI <sub>2</sub> -T), 1%CN  | 1.38*10 <sup>-5</sup>         | 6.94*10 <sup>-4</sup>         |

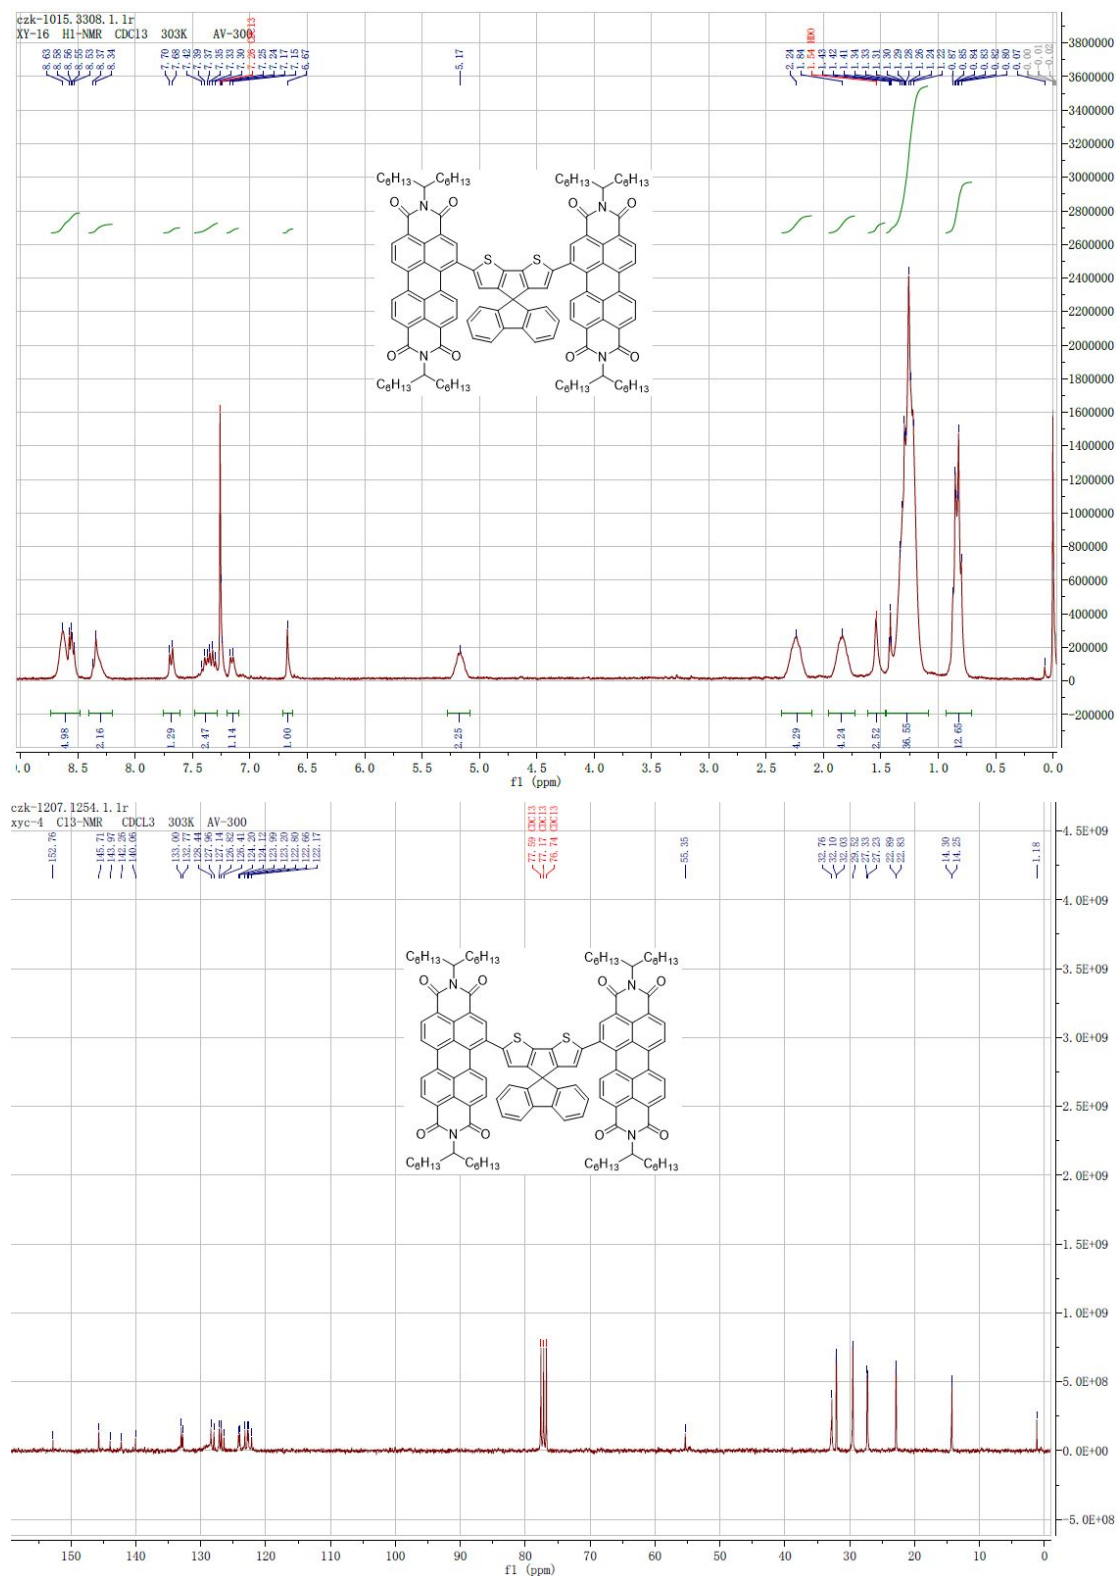

**Figure S6.**  $^1\text{H}$ NMR and  $^{13}\text{C}$ NMR spectra of SDTF-PDI<sub>2</sub>

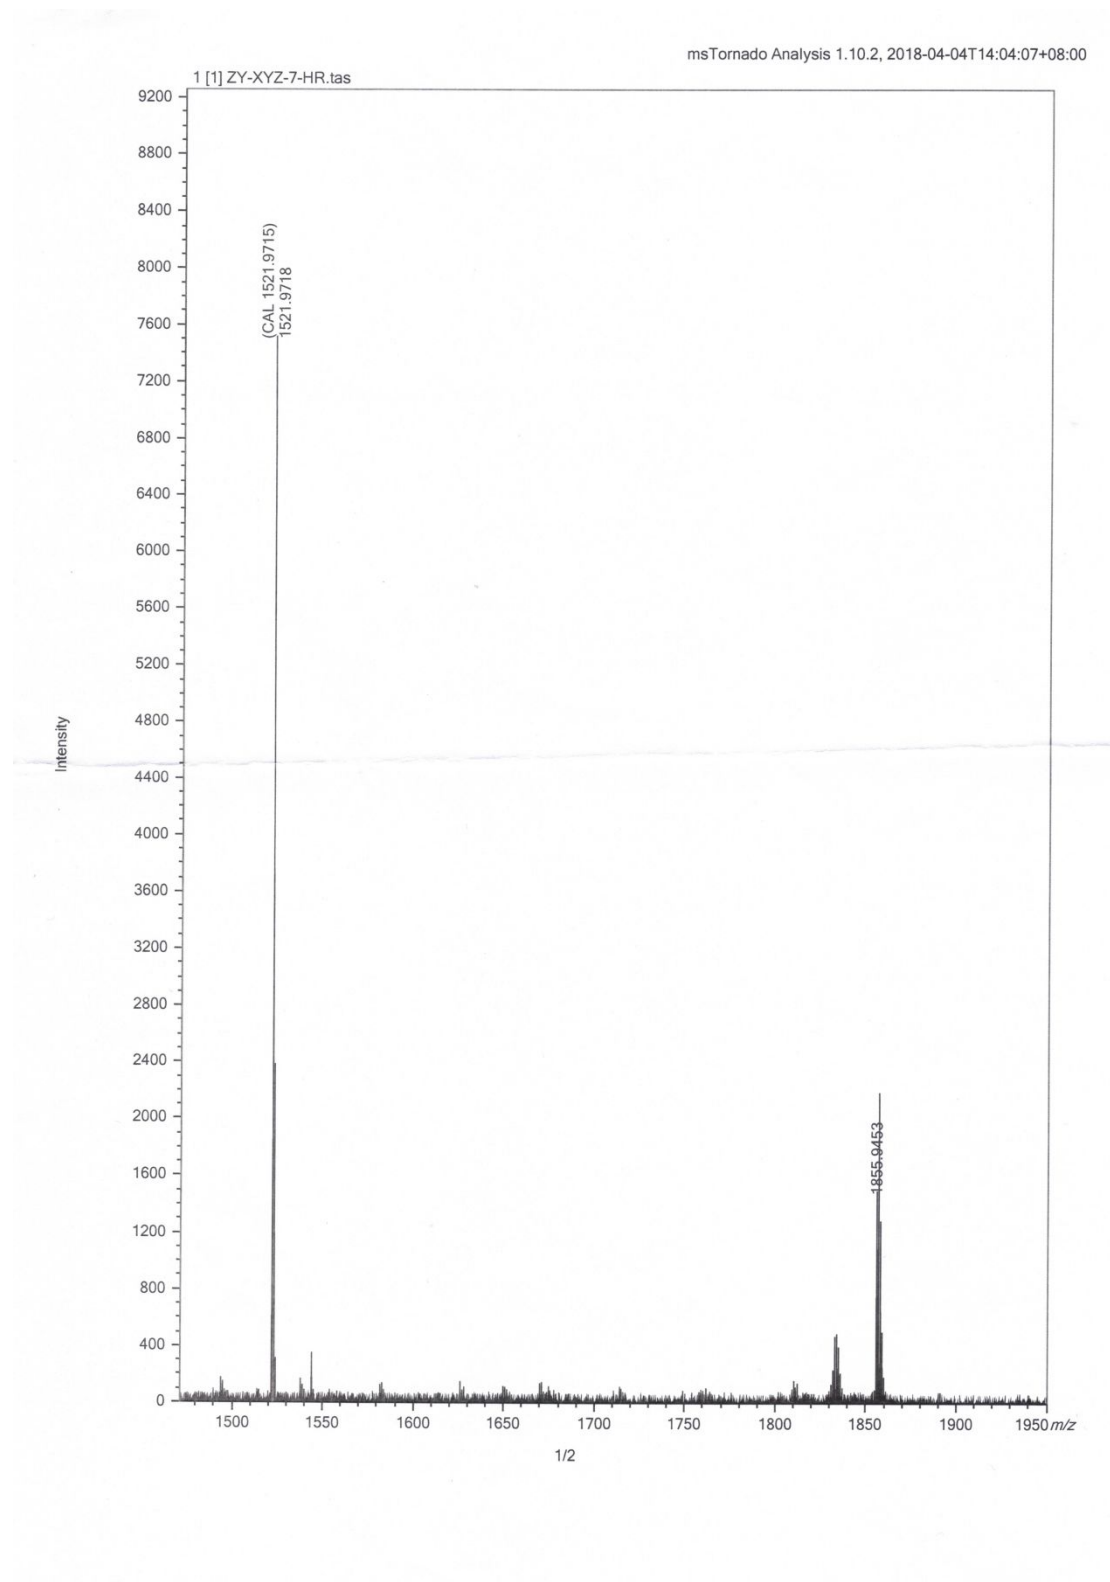

**Figure S7.** The MALDI-TOF-MS of SDTF-PDI<sub>2</sub>



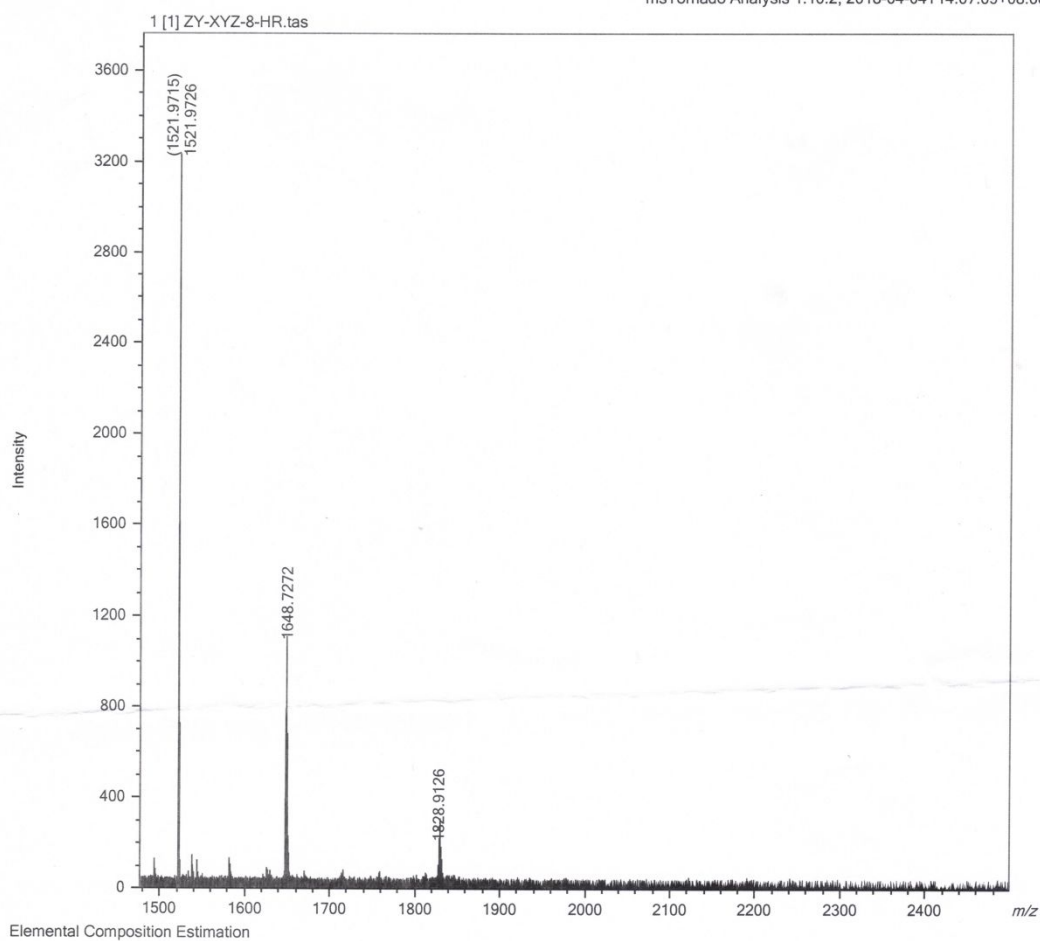

## Parameters:

|          |                      |           |         |               |        |              |             |
|----------|----------------------|-----------|---------|---------------|--------|--------------|-------------|
| Mass     | 1828.91256 ± 0.00914 | Tolerance | 5.0 ppm | Electron Mode | Charge | DBE Range    | Max Results |
|          |                      |           |         | Odd/Even      | +1     | -0.5 - 200.0 | 100         |
| Elements |                      |           |         |               |        |              |             |
| C        | 0 - 125              | H         | 0 - 135 | N             | 0 - 4  | O            | 0 - 8       |
|          |                      |           |         |               |        | S            | 0 - 2       |

## Results:

| # | Formula            | Mass       | DBE  | Abs. Error (u) | Error (u) | Error (ppm) |
|---|--------------------|------------|------|----------------|-----------|-------------|
| 1 | C124 H124 N4 O8 S  | 1828.91344 | 65.0 | 0.00088        | -0.00088  | -0.48       |
| 2 | C121 H128 N4 O8 S2 | 1828.91681 | 60.0 | 0.00425        | -0.00425  | -2.32       |
| 3 | C125 H126 N3 O6 S2 | 1828.90826 | 64.5 | 0.00430        | 0.00430   | 2.35        |

**Figure S9.** The MALDI-TOF-MS of SDTF-FPDI<sub>2</sub>

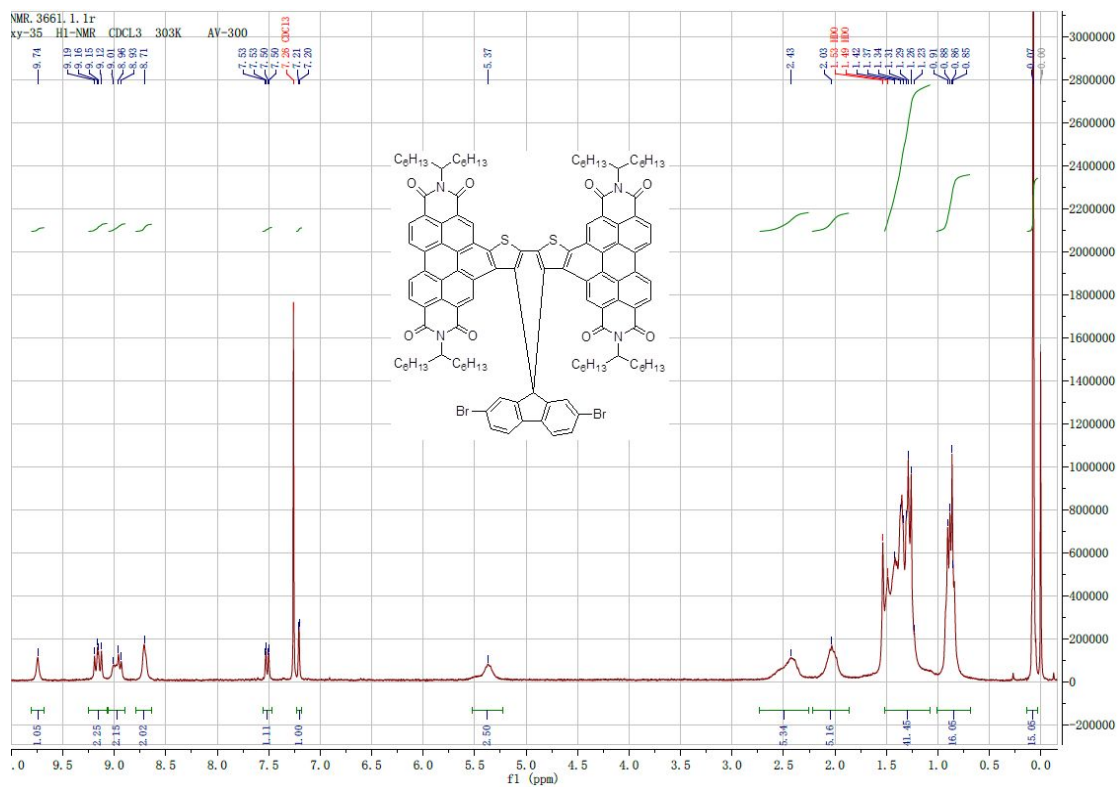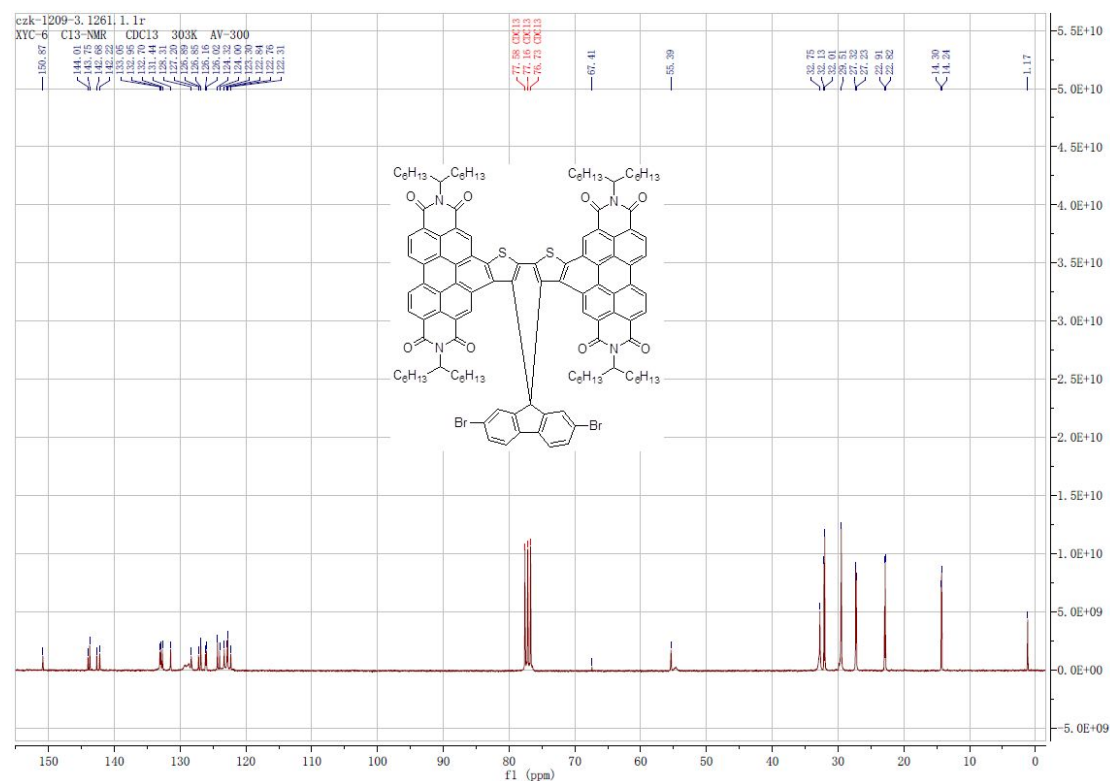

**Figure S10.** <sup>1</sup>HNMR and <sup>13</sup>CNMR spectra of SDTF-FPDI<sub>2</sub>-diBr

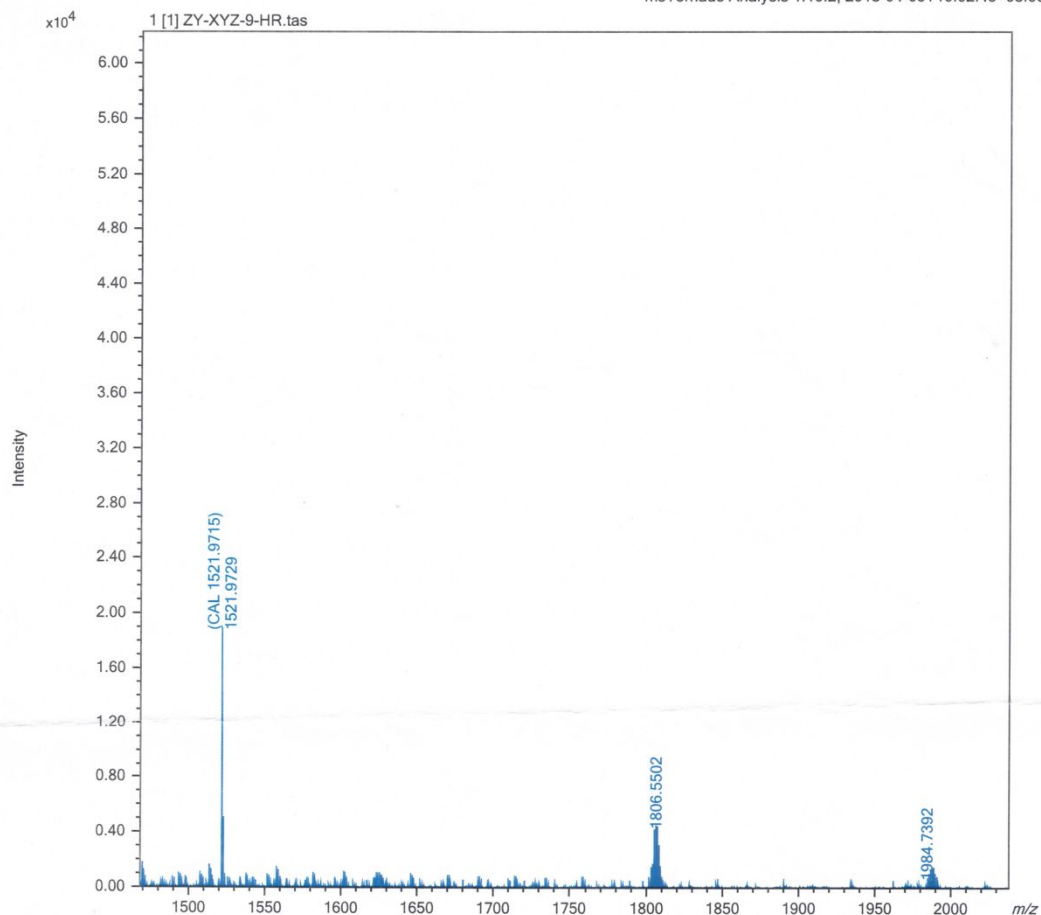

Elemental Composition Estimation

Parameters:

| Mass                     | Tolerance | Electron Mode | Charge  | DBE Range    | Max Results |
|--------------------------|-----------|---------------|---------|--------------|-------------|
| 1984.73916 $\pm$ 0.00992 | 5.0 ppm   | Odd/Even      | +1      | -0.5 - 200.0 | 100         |
| Elements                 |           |               |         |              |             |
| C 0 - 125                | H 0 - 130 | N 0 - 5       | O 0 - 8 | S 0 - 2      | Br 0 - 2    |

Results:

| # | Formula                                                                                        | Mass       | DBE  | Abs. Error (u) | Error (u) | Error (ppm) |
|---|------------------------------------------------------------------------------------------------|------------|------|----------------|-----------|-------------|
| 1 | C <sub>121</sub> H <sub>126</sub> N <sub>4</sub> O <sub>8</sub> S <sub>2</sub> Br <sub>2</sub> | 1984.73784 | 60.0 | 0.00133        | 0.00133   | 0.67        |
| 2 | C <sub>124</sub> H <sub>124</sub> N <sub>5</sub> O <sub>5</sub> S <sub>2</sub> Br <sub>2</sub> | 1984.74052 | 64.5 | 0.00135        | -0.00135  | -0.68       |
| 3 | C <sub>124</sub> H <sub>122</sub> N <sub>4</sub> O <sub>8</sub> S <sub>2</sub> Br <sub>2</sub> | 1984.73446 | 65.0 | 0.00470        | 0.00470   | 2.37        |
| 4 | C <sub>125</sub> H <sub>124</sub> N <sub>3</sub> O <sub>8</sub> S <sub>2</sub> Br <sub>2</sub> | 1984.74704 | 64.5 | 0.00788        | -0.00788  | -3.97       |
| 5 | C <sub>125</sub> H <sub>124</sub> N <sub>3</sub> O <sub>6</sub> S <sub>2</sub> Br <sub>2</sub> | 1984.72928 | 64.5 | 0.00988        | 0.00988   | 4.98        |

Figure S11. The MALDI-TOF-MS of SDTF-FPDI<sub>2</sub>-diBr



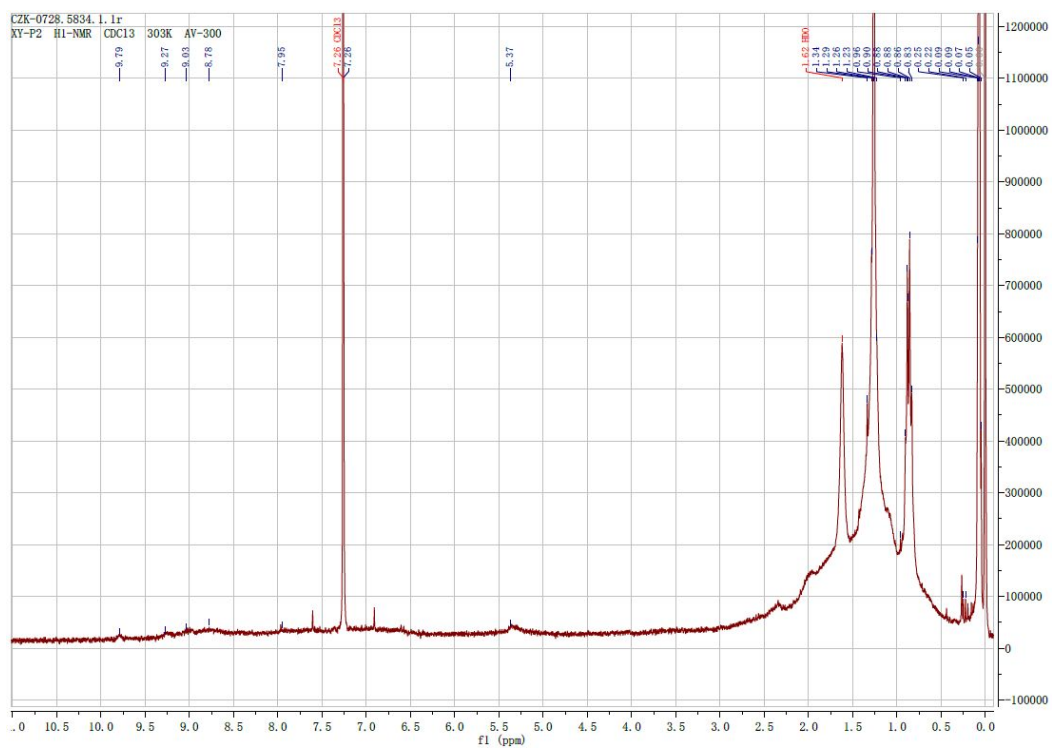

**Figure S12.**  $^1\text{H}$ NMR of P(SDTF-FPDI<sub>2</sub>-T)

## Cirrus GPC Sample Injection Report

Generated by: gpc

Saturday, June 23, 2018 10:18 AM

Workbook: E:\Cirrus Workbooks\IAM20161212\IAM20161212.plw

### Sample Details

Sample Name: XY\_2

Acquired: 6/21/2018 6:08:29 PM

By Analyst: gpc

Batch Name: 20180621

Concentration: 0.10 mg/ml Injection Volume: 200.0 ul K of Sample: 14.1000 Alpha of Sample:

0.7000

Analysis Using Method: 20171213

Calibration Used: 1/17/2018 4:36:17 PM

Calibration Type: Narrow Standard Curve Fit Used: 1

K: 14.1000

Alpha: 0.7000

Calibration Curve:  $y = 10.450770 - 0.454795x^{*1}$

High Limit MW RT: 11.22 mins

Low Limit MW RT: 17.10 mins

Flow Marker RT: 0.00 mins

FRCF: 1.0000

FRM Name:

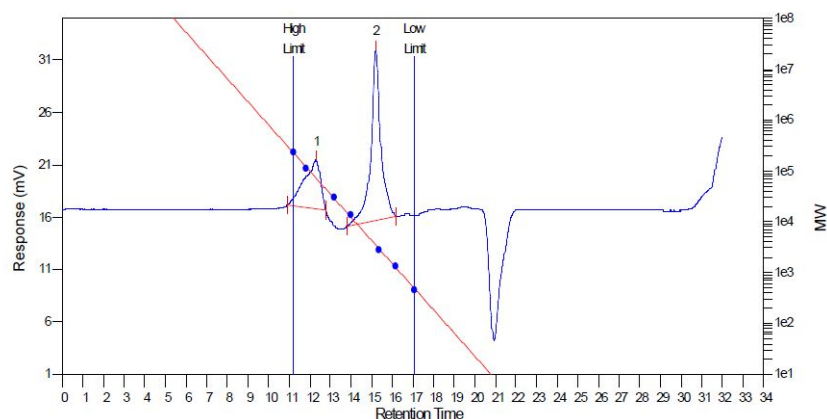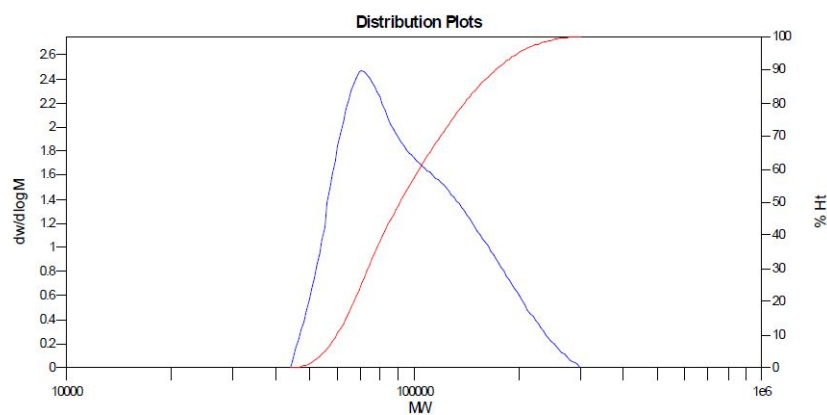

### MW Averages

| Peak No | Mp    | Mn    | Mw     | Mz     | Mz+1   | Mv     | PD      |
|---------|-------|-------|--------|--------|--------|--------|---------|
| 1       | 70665 | 88982 | 104052 | 123726 | 145966 | 101430 | 1.16936 |
| 2       | 3511  | 3321  | 3755   | 4388   | 5355   | 3678   | 1.13068 |

### Processed Peaks

| Peak No | Name | Start RT (mins) | Max RT (mins) | End RT (mins) | Pk Height (mV) | % Height | Area (mV.secs) | % Area  |
|---------|------|-----------------|---------------|---------------|----------------|----------|----------------|---------|
| 1       |      | 10.93           | 12.32         | 12.77         | 4.66304        | 22.2853  | 249.007        | 30.8823 |
| 2       |      | 13.80           | 15.18         | 16.17         | 16.2613        | 77.7147  | 557.303        | 69.1177 |

Figure S13. GPC of P(SDTF-FPDI<sub>2</sub>-T)
